# Supplementary material
Source: HighWire-hosted journal article supplement (https://bmjopen.bmj.com/content/9/5/e021739)
Supplement: inline-supplementary-material-1 [file inline-supplementary-material-1.pdf]

(a) Men

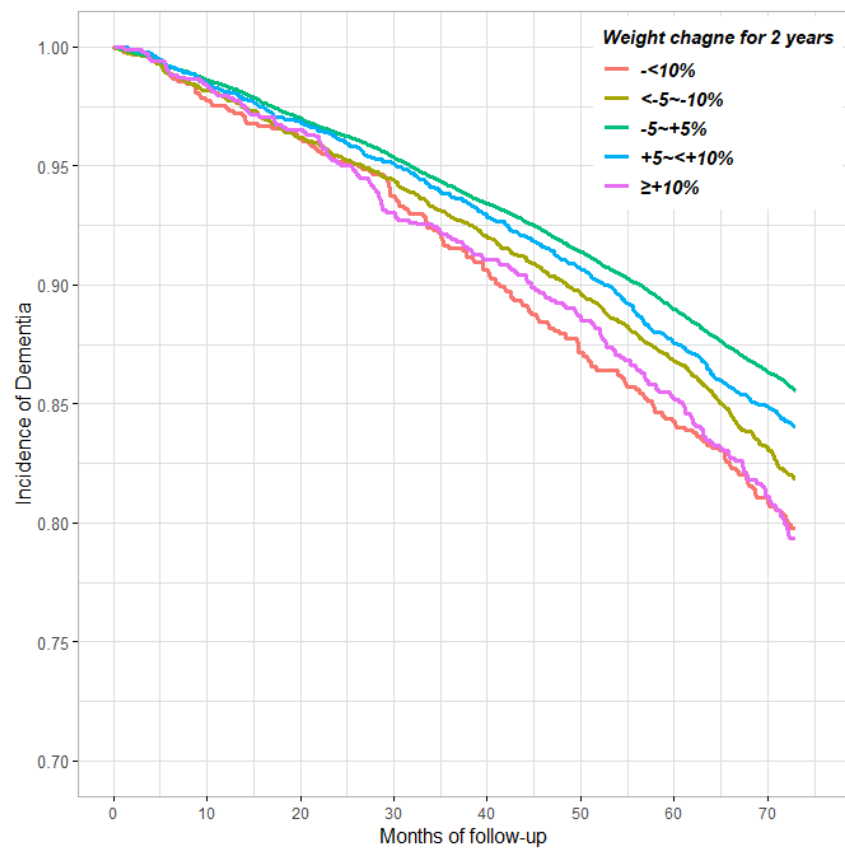

(b) Women

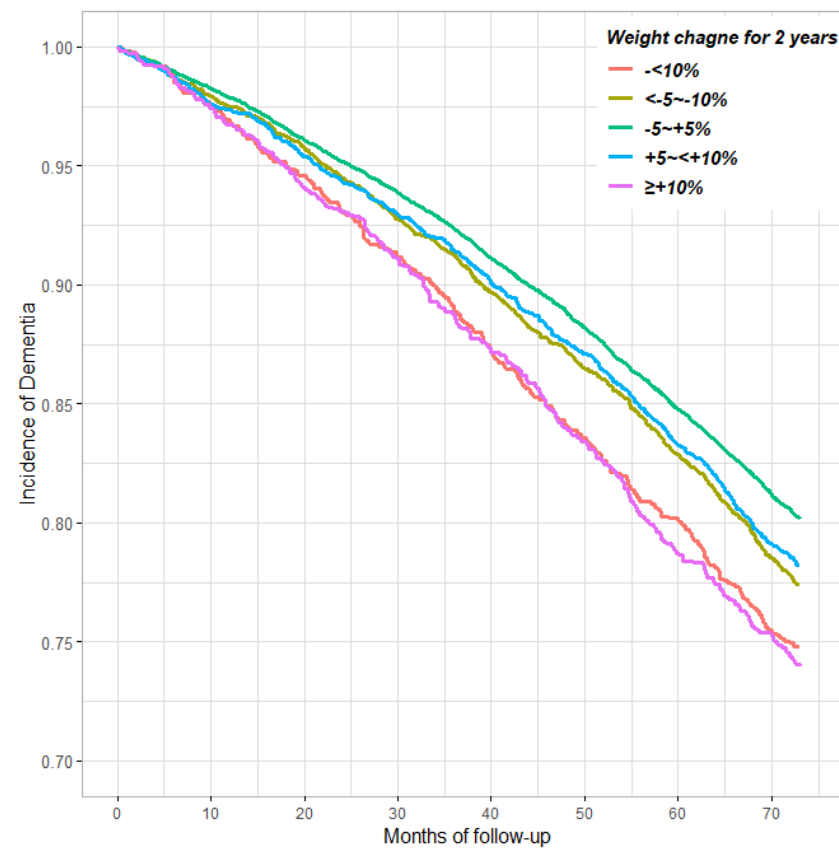

Supplementary Figure 1. Survival plots for 2-year change in body mass index and dementia incidence
